# Supplementary material for: Lidocaine-Loaded Solid Lipid Microparticles (SLMPs) Produced from Gas-Saturated Solutions for Wound Applications
Source: MDPI journal article supplement (doi:10.3390/pharmaceutics12090870), 2020-09-12
Supplement: s1 [file s1]

# Supplementary Materials: Lidocaine-loaded solid lipid microparticles (SLMPs) produced from gas-saturated solutions for wound applications

Clara López-Iglesias, Cristina Quílez, Joana Barros, Diego Velasco, Carmen Alvarez-Lorenzo, José L. Jorcano, Fernando J. Monteiro and Carlos A. García-González \*

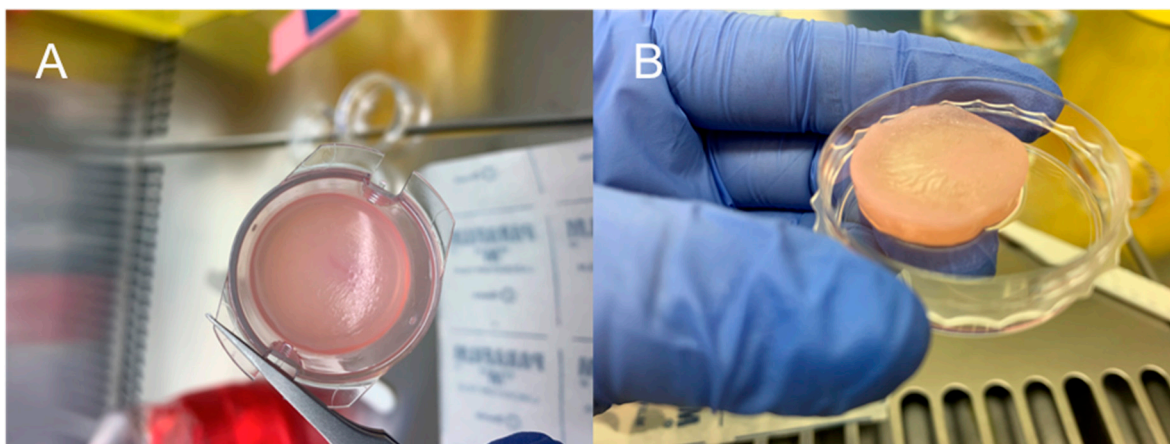

**Figure S1.** Visual appearance of (A) Bioprinted human skin equivalents in cellular inserts, and (B) once removed from the inserts for certain permeation tests in Franz diffusion cells.

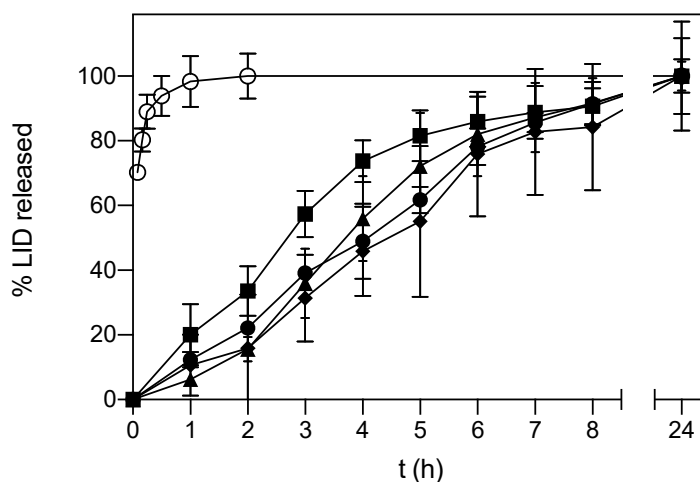

**Figure S2.** Release profile (in percentage of drug released) of raw LID (white circles), GMS-LID1 (black circles), GMS-LID2 (diamonds), GMS-LID4 (triangles) and GMS-LID10 (squares) particles in PBS pH 7.4 at 37 °C and 100 rpm.
